# Supplementary material for: Harnessing reaction-based probes to preferentially target pancreatic β-cells and β-like cells
Source: Life Sci Alliance. 2021 Jan 28;4(4):e202000840. doi: 10.26508/lsa.202000840 (PMC7898467; doi:10.26508/lsa.202000840)
Supplement: Supplementary file 2 [file LSA-2020-00840_TableS2.xlsx]

## Sheet: Sheet2
Table S2. Donor information
	Batch-1	Batch-2	Batch-3	Batch-4
Donor ID	SAMN09767131	SAMN09929411	SAMN10391370	SAMN10602026
Purity	0.8	0.9	0.9	0.9
Viability	0.96	0.95	0.9	0.9
Health	Nondiabetic	Nondiabetic	Nondiabetic	Nondiabetic
Age	29	37	48	51
Gender	M	M	M	F
BMI	24.1	29	24.4	28.5
Ethnicity/Race	Hispanic/Latino	Black or African American	Hispanic	White
Cause of Death	Cerebrovascular/stroke	Head Trauma	Head Trauma	Cerebrovascular/stroke
Source	Southern California Islet Cell Resources Center	The Scharp-Lacy Research Institute	University of Miami	University of Miami
