# Supplementary material for: Harnessing reaction-based probes to preferentially target pancreatic β-cells and β-like cells
Source: Life Sci Alliance. 2021 Jan 28;4(4):e202000840. doi: 10.26508/lsa.202000840 (PMC7898467; doi:10.26508/lsa.202000840)
Supplement: Supplementary file 3 [file LSA-2020-00840_TableS3.xlsx]

## Sheet: Sheet1
Table S3. Antibody information
Rat anti-C-Peptide (1:100)	Developmental Studies Hybridoma Bank	GN-ID4; RRID: AB_2255626
Guinea Pig anti-Insulin (1:400)	Abcam	ab7842; RRID: AB_306130
Mouse anti-Glucagon (1:10,000)	Sigma	G2654; RRID: AB_259852
Rabbit anti-PDX1 (1:400)	Cell Signaling	5679; RRID: AB_10706174
Mouse anti-NKX6.1 (1:100)	Developmental Studies Hybridoma Bank	F55A12; RRID: AB_532379
Rabbit anti-CK-19 (1:200)	Abcam	ab15463; RRID: AB_2281021
Mouse anti-Ki67 AF647 (1:50)	BD Biosciences	558615; RRID: AB_647130
APC Annexin V (1:20)	BD Biosciences	550475
Donkey anti-Guinea Pig AF594 (1:400)	Jackson ImmunoResearch	706-586-148; RRID: AB_42340475
Donkey anti-Rat AF488 (1:400)	Jackson ImmunoResearch	712-546-153; RRID: AB_2340686
Donkey anti-Mouse AF594 (1:400)	Jackson ImmunoResearch	715-586-150; RRID: AB_2340857
Donkey anti-Rabbit AF594 (1:400)	Jackson ImmunoResearch	711-586-152; RRID: AB_2340622
